# Supplementary material for: A systematic study of Tupaia as a model for human acute hepatitis B infection
Source: PubMed Central journal article supplement — J Vet Med Sci. 2021 Apr 29;83(6):1004–11. doi: 10.1292/jvms.21-0026 (PMC8267197; doi:10.1292/jvms.21-0026), 2021-04-29
Supplement: jvms-83-1004-s001.pdf [file jvms-83-1004-s001.pdf]

## **Supplementary Data**

### **Supporting Experimental Procedures**

#### ***Sample harvest from tupaia.***

Blood samples from 10 HBV-inoculated tupaia and 10 control tupaia were taken from the tail venous plexus for serological analysis and ALT detection on day 4 prior to inoculation and on days 9, 15, 21, and 42 post-inoculation (p.i.). Liver biopsy samples were obtained by surgery from the other 4 HBV-inoculated tupaia at the intervals mentioned above for immunohistochemistry, pathological assessments, and cccDNA detection. A liver biopsy sample from the 1 remaining PBS-inoculated tupaia was obtained as a control.

#### ***Infection inhibition by an inhibitory peptide for viral entry***

The inhibitory peptide contained 47 amino acids based on the Pre-S113–59 of HBV genotype C with a myristoylation at the N-terminus. The complete sequence is: myr-GTNLSVPNPLGFFPDHQLDPAFGANSNNPDWDFNPNKDHWPENQVG-NH<sub>2</sub>.

This peptide was chemically synthesized with more than 98% purity (Chinese Peptide Company, Hangzhou, China) and could inhibit HBV infection of primary tupaia hepatocytes *in vitro* with a 50% inhibitory concentration (IC<sub>50</sub>) of 1.6 nM. To block HBV infection *in vivo*, the peptide was subcutaneously administered at a dose of 2 mg/kg to another group of 10 tupaia simultaneously with HBV inoculation and then again on days 1, 2, 3, 5, 7, 9, and 13 p.i.

#### ***Protein-free DNA extraction.***

Liver samples were homogenized with 200  $\mu$ L of homogenization buffer (50 mM Tris·HCl [pH 8], 1 mM EDTA, 0.2% Nonidet P-40, 0.15 M NaCl) in a Potter-Elvehjem tissue grinder. The cell nuclei in the homogenate was lysed in 200  $\mu$ L lysis buffer (6% [vol/vol] SDS/0.1 M NaOH) followed by incubation at 37°C for 30 min and occasional mixing. The alkaline lysate was neutralized by 100  $\mu$ L neutralization buffer (3 M KAc [pH 4.8]), followed by centrifugation at 12,000  $\times$  g for 15 min at 4°C. The nucleic acids in the supernatant were extracted with 600  $\mu$ L water-saturated phenol (pH 4.5) and chloroform, and then precipitated by isopropanol in the presence of 10  $\mu$ g glycogen. The precipitated protein-free nucleic acids were dissolved in 50  $\mu$ L TE (10 mM Tris·HCl [pH 7.5]/1 mM EDTA) and stored at -70 °C for HBV cccDNA analysis.

#### ***cccDNA detection***

cccDNA was amplified with RCA using a phi29 phage DNA polymerase (New England BioLabs, Ipswich, MA); this method was specific for cccDNA, as the virion-derived relaxed circular HBV DNA could not be amplified by this method. After digestion with the SpeI restriction enzyme (New England BioLabs), the RCA products were probed with a digoxin-labeled HBV-specific probe as previously described (28). Furthermore, the cccDNA content was determined using a commercially available real-time PCR kit (Shanghai Fosun Biology High Technology Ltd.). The selective primers for cccDNA amplification (sense: nucleotides 1540–1570; antisense: nucleotides 1910–1870) and FAM-labeled probe (nucleotides 1540–1580) were positioned at the Pre-C region, which spanned the

single-stranded gap of relaxed circular HBV DNA. To enhance the specificity, DNA samples were digested with plasmid-safe DNase to remove HBV relaxed genomic DNA from the cccDNA. In this real-time PCR system, the cccDNA could be specifically amplified while avoiding false negative reactions in the presence of HBV DNA at no more than  $10^7$  copies/mL. The detection limit was 20 copies/mg protein-free DNA.

**Supplementary Fig. 1.** The Pre-S1-derived HBV entry inhibitor, hepalatide, bound to the HBV receptor NTCP and blocked HBV infection of primary tupaia hepatocytes *in vitro*. (A) FITC-labeled hepalatide was inoculated with cultured primary tupaia hepatocytes for 10 min at a concentration of 100  $\mu\text{g/mL}$ , followed by washing 3 times with PBS. The cells were then observed under a fluorescence microscope at 490 nm. To confirm whether hepalatide could bind human NTCP, the functional receptor for HBV infection, FITC-labeled hepalatide was inoculated with the LO2 liver cell line stably transfected with vector plasmid (B) or a human NTCP-encoding plasmid (C). To test the inhibitory effect on HBV infection by hepalatide, cultured primary tupaia hepatocytes were inoculated with HBV purified from CHB patients at 100 copies of genomic HBV DNA per cell; simultaneously, hepalatide was administered at final concentrations of 0, 2.5, 5, 10, 20, and 40 ng/mL. Inoculum-containing supernatant was removed 12 h after inoculation, and the cells were washed 3 times with PBS. The culture was continued with medium refreshed every 3 days. HBsAg secreted into the culture medium on day 9 p.i. was quantitatively analyzed by ECLIA (D). A COI greater than 1 was considered positive. Because of the competitive relationship between HBV and the entry inhibitor in terms of binding to the same HBV receptor, NTCP, the association between the HBV infection parameter of HBsAg and inhibitor concentration was regressed into a linear equation after logit-log transformation (E). The calculated 50% inhibitory concentration (IC<sub>50</sub>) was 8.5 ng/mL (equivalent to 1.6 nM).

A

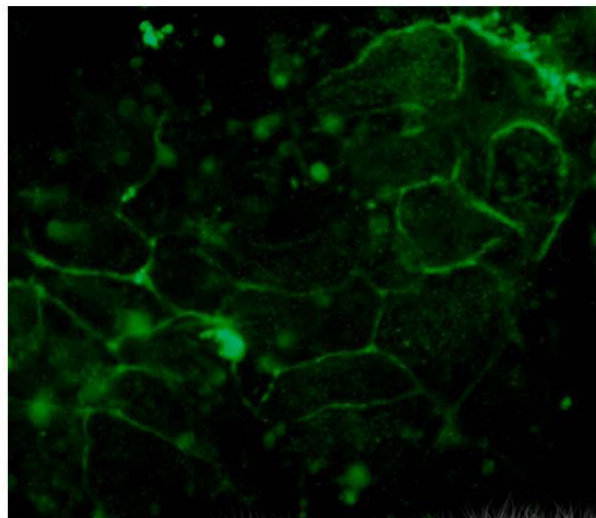

B

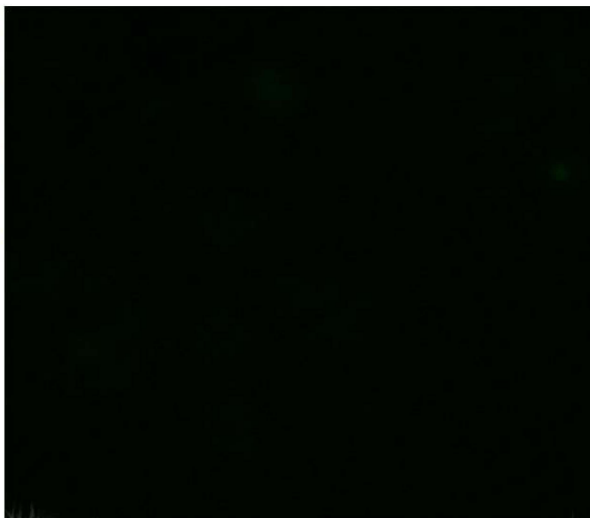

C

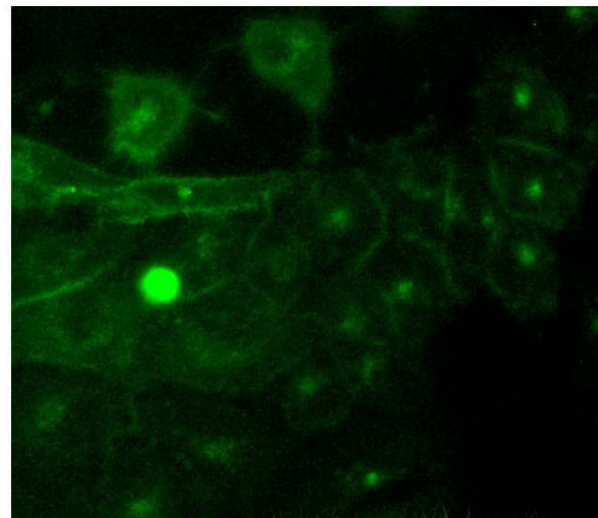

D

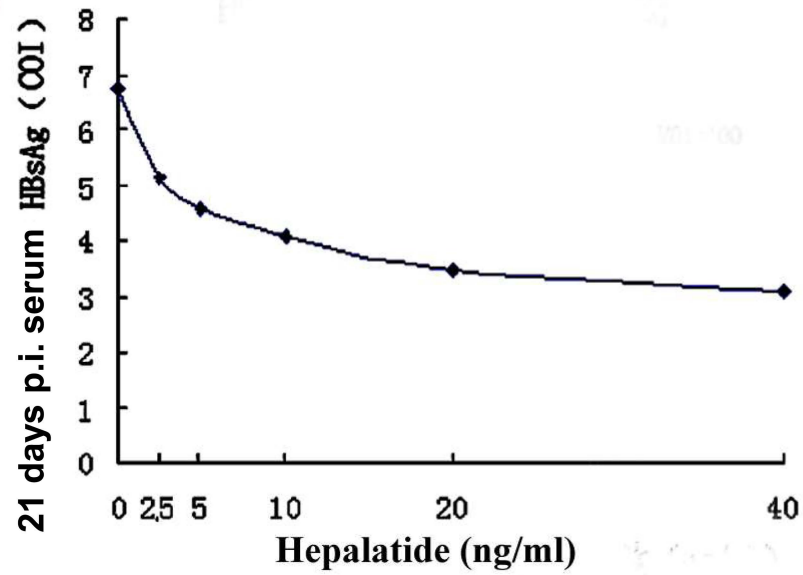

E

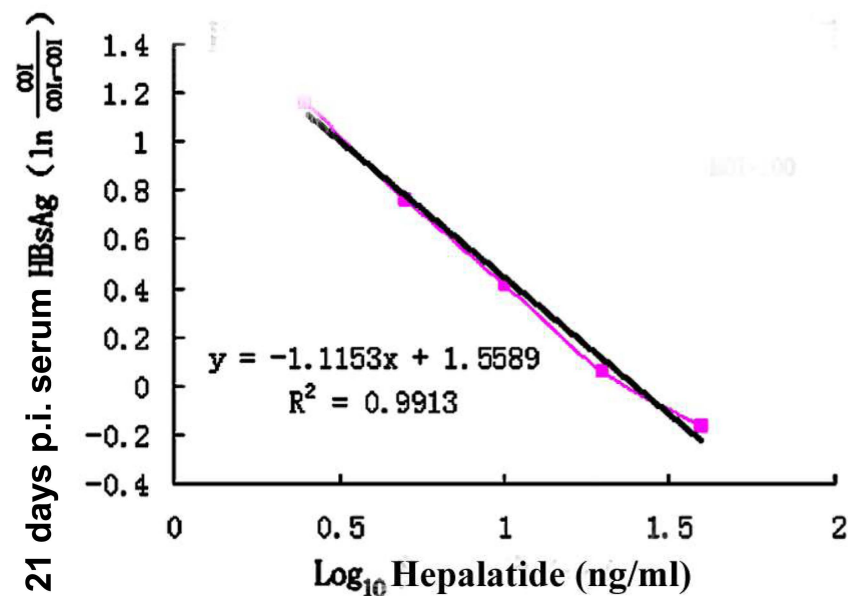

**Supplementary Table 1. HBsAg, HBeAg, and HBV DNA concentration in the serum of each of the 10 HBV-inoculated tupaias before (b.i) and after (p.i) inoculation**

| Animal<br>(No.) | HBsAg (cut-off index) |       |        |        |        | HBeAg (cut-off index) |       |        |        |        | HBV DNA (copies/ml) |       |        |        |        |
|-----------------|-----------------------|-------|--------|--------|--------|-----------------------|-------|--------|--------|--------|---------------------|-------|--------|--------|--------|
|                 | day -4                | day 9 | day 15 | day 21 | day 42 | day -4                | day 9 | day 15 | day 21 | day 42 | day -4              | day 9 | day 15 | day 21 | day 42 |
| 1               | 0.933                 | 0.781 | 0.593  | 0.834  | 0.327  | 0.109                 | 0.124 | 0.128  | 0.138  | 0.149  | ND                  | ND    | ND     | ND     | ND     |
| 2               | 0.93                  | 8.89  | 1.1    | 0.968  | 0.476  | 0.115                 | 9.06  | 1.6    | 0.171  | 0.629  | ND                  | 438   | 466    | ND     | ND     |
| 3               | 0.879                 | 21.98 | 1.68   | 0.902  | 0.465  | 0.221                 | 22.15 | 11.65  | 0.204  | 0.184  | ND                  | 15000 | 6730   | ND     | ND     |
| 4               | 0.969                 | 25.39 | 1.3    | 0.412  | 0.786  | 0.114                 | 5.9   | 0.583  | 0.232  | 0.391  | ND                  | 436   | 460    | ND     | ND     |
| 5               | 0.783                 | 1.7   | 0.661  | 0.923  | 0.526  | 0.116                 | 22.42 | 0.508  | 0.135  | 0.425  | ND                  | 570   | 345    | 97     | 38     |
| 6               | 0.729                 | 6.96  | 1.48   | 0.625  | 0.59   | 0.122                 | 43.68 | 2.76   | 0.567  | 0.143  | ND                  | 444   | 278    | 1020   | ND     |
| 7               | 0.562                 | 213.5 | 21.49  | 11.87  | 0.573  | 0.102                 | 26.18 | 21.76  | 16.92  | 0.204  | ND                  | 14000 | 18400  | 1420   | ND     |
| 8               | 0.414                 | 3.66  | 1.27   | 1.92   | 0.247  | 0.122                 | 9.02  | 1.82   | 0.416  | 0.264  | ND                  | 1600  | 1400   | 300    | ND     |
| 9               | 0.547                 | 1.88  | 0.951  | 0.574  | 0.217  | 0.119                 | 4.93  | 0.769  | 0.283  | 0.443  | ND                  | 1520  | 1900   | ND     | ND     |
| 10              | 0.628                 | 1.24  | 3.9    | 0.472  | 0.21   | 0.109                 | 12.99 | 4.98   | 0.338  | 0.401  | ND                  | ND    | ND     | 52     | ND     |

ND: non-detectable; ■ No infection; ■ Super infection; ■ Routine infection

**Supplementary Table 2. Intrahepatic cccDNA levels detected in liver biopsy from a single tupaia by real-time PCR (copies/mg protein-free DNA).**

| Test | Days b.i. |       | Days p.i. |    |    |
|------|-----------|-------|-----------|----|----|
|      | 4         | 9     | 15        | 21 | 42 |
| 1    | 0         | 2,268 | 739       | 68 | 5  |
| 2    | 0         | 2,357 | 774       | 59 | 3  |
| 3    | 0         | 2,410 | 759       | 59 | 4  |
| Mean | 0         | 2,345 | 757       | 62 | 4  |

**Supplementary Table 3. ALT activity in serum from each of the 10 HBV-inoculated tupaia before (b.i.) and after (p.i.) inoculation.**

| Animal<br>(No.)        | Day 4 b.i.  |           | Day 21 p.i.   |           |
|------------------------|-------------|-----------|---------------|-----------|
|                        | IU/mL       | ×NL*      | IU/mL         | ×NL*      |
| 1                      | 65          | 1.1       | 311           | 5.5       |
| 2                      | 48          | 0.8       | 60            | 1.1       |
| 3                      | 11          | 0.2       | 31            | 0.5       |
| 4                      | 88          | 1.5       | 360           | 6.3       |
| 5                      | 49          | 0.9       | 72            | 1.3       |
| 6                      | 49          | 0.9       | 95            | 1.7       |
| 7                      | 28          | 0.5       | 170           | 3.0       |
| 8                      | 121         | 2.1       | 214           | 3.8       |
| 9                      | 68          | 1.2       | 106           | 1.9       |
| 10                     | 101         | 1.8       | 194           | 3.4       |
| Mean ± SD              | 62.8 ± 33.3 | 1.1 ± 0.6 | 161.3 ± 109.8 | 2.9 ± 1.9 |
| <i>P</i> <sup>**</sup> | 0.009       |           |               |           |

\*Normal Level (NL) = 56.8 IU/ml; \*\*By paired-sample *t*-test using SPSS 16.0 software.
